# Supplementary material for: Health research capacity development in low and middle income countries: reality or rhetoric? A systematic meta-narrative review of the qualitative literature
Source: PubMed Central journal article supplement — BMJ Open. 2017 Jan 27;7(1):e012332. doi: 10.1136/bmjopen-2016-012332 (PMC5278257; doi:10.1136/bmjopen-2016-012332), 2017-01-27
Supplement: bmjopen-2016-012332supp1.pdf [file bmjopen-2016-012332supp1.pdf]

## Supplementary file S1: All papers included in the systematic review

- ABBOOD, S. A. 2002. Medical research in developing countries still in Cinderella status. *Saudi Med J*, 23, 1554-6.
- ABU-ZIDAN, F. M. & RIZK, D. E. 2005. Research in developing countries: problems and solutions. *Int Urogynecol J Pelvic Floor Dysfunct*, 16, 174-5.
- ADAM, T., AHMAD, S., BIGDELI, M., GHAFAR, A. & ROTTINGEN, J. A. 2011. Trends in health policy and systems research over the past decade: still too little capacity in low-income countries. *PLoS One*, 6, e27263.
- ADDAE-MENSAH, I., FAKOREDE, F., HOLTEL, A. & NWAKA, S. 2011. Traditional medicines as a mechanism for driving research innovation in Africa. *Malar J*, 10 Suppl 1, S9.
- AIRHIHENBUWA, C. O., SHISANA, O., ZUNGU, N., BELUE, R., MAKOFANI, D. M., SHEFER, T., SMITH, E. & SIMBAYI, L. 2011. Research capacity building: a US-South African partnership. *Glob Health Promot*, 18, 27-35.
- AKHTAR, W., ARAIN, M. A., ALI, A. & SAJJAD, Z. 2012. Interventions for improving research productivity in clinical radiology. *J Coll Physicians Surg Pak*, 22, 478-9.
- AKSOY, S. 2010. Solutions to neglected tropical diseases require vibrant local scientific communities. *PLoS Negl Trop Dis*, 4, e662.
- ALEM, A. & KEBEDE, D. 2003. Conducting psychiatric research in the developing world: challenges and rewards. *Br J Psychiatry*, 182, 185-7.

- ALI, R., FINLAYSON, A. & NETWORK, I. C. R. 2012. Building capacity for clinical research in developing countries: the INDOX cancer research network experience. *Global Health Action*, 5, 1-6.
- ALI, R. & RAINA, V. 2008. Developing innovative models for North-South cooperation in clinical research--experience from the INDOX Cancer Research Network. *Ann Oncol*, 19, 831-3.
- AMEH, E. A., DAUDA, M. M. & NMADU, P. T. 2008. Paediatric surgical research and publications in a developing country setting. *Afr J Paediatr Surg*, 5, 3-7.
- ANDRONIKOU, S. & MNGOMEZULU, V. 2011. Paediatric radiology seen from Africa. Part II: recognising research advantages in a developing country. *Pediatr Radiol*, 41, 826-31.
- ANDRUCHOW, J. E., SOSKOLNE, C. L., RACIOPPI, F. & BERTOLLINI, R. 2005. Capacity building for epidemiologic research: a case study in the newly independent state of Azerbaijan. *Ann Epidemiol*, 15, 228-31.
- ANNERSTEDT, J. & LIYANAGE, S. 2008. Challenges when Shaping Capabilities for Research: Swedish Support to Bilateral Research Cooperation with Sri Lanka and Vietnam, 1976–2006, and a Look Ahead. *In: COOPERATION*, D. F. R. (ed.). Stockholm: SWEDISH INTERNATIONAL DEVELOPMENT COOPERATION AGENCY.
- ARAI, R. J., MANO, M. S., DE CASTRO, G., DIZ, M. D. E. & HOFF, P. M. G. 2010. Building research capacity and clinical trials in developing countries. *Lancet Oncology*, 11, 712-713.
- ARENAS-LOPEZ, S., FAJARDO, C., VALLS I SOLER, A., GARCIA-CORZO, J. R., LIMA-ROGEL, M. V., CALLE, G., LEITE, R., LOBOS, E., HUME-WRIGHT, Q.

- & MACLEOD, S. 2011. Pediatric clinical trials in Latin America and Guyana: present views of local practitioners and ways to embrace the future. *Paediatr Drugs*, 13, 257-65.
- ATUKORALA, K. R., SUMANASEKARA, D. R., WICKRAMASINGHE, K. H., RATNAYAKE, G. M., JAYASENA, G. M., WEERATUNGA, P. N., WICKRAMASINGHE, S. I. & JAYASINGHE, S. 2012. Medical student research output in a developing country: where has all the research gone? *Med Teach*, 34, 998.
- BARBOUR, V., COHEN, B. & YAMEY, G. 2004. A new vision for clinical trials in Africa. *PLoS Med*, 1, e71.
- BARRETO, M. L. 2009. Health research in developing countries. *BMJ*, 339, b4846.
- BATES, I., AKOTO, A. Y., ANSONG, D., KARIKARI, P., BEDU-ADDO, G., CRITCHLEY, J., AGBENYEGA, T. & NSIAH-ASARE, A. 2006. Evaluating health research capacity building: an evidence-based tool. *PLoS Med*, 3, e299.
- BATES, I., ANSONG, D., BEDU-ADDO, G., AGBENYEGA, T., AKOTO, A. Y., NSIAH-ASARE, A. & KARIKARI, P. 2007. Evaluation of a learner-designed course for teaching health research skills in Ghana. *BMC Med Educ*, 7, 18.
- BATES, I., TAEGTMEYER, M., SQUIRE, S. B., ANSONG, D., NHLEMA-SIMWAKA, B., BABA, A. & THEOBALD, S. 2011. Indicators of sustainable capacity building for health research: analysis of four African case studies. *Health Res Policy Syst*, 9, 14.
- BAUM, B. J., SCOTT, J., BICKEL, M., GOMBOS, G., GREENSPAN, J. S., GUO, W., PARK, N. H., PURDELL-LEWIS, D., RANNEY, R., SCHWARZ, E., SEYMOUR,

- G. & UOSHIMA, K. 2002. Global challenges in research and strategic planning. *Eur J Dent Educ*, 6 Suppl 3, 179-84.
- BENNETT, S., ADAM, T., ZAROWSKY, C., TANGCHAROENSATHIEN, V., RANSON, K., EVANS, T. & MILLS, A. 2008. From Mexico to Mali: progress in health policy and systems research. *Lancet*, 372, 1571-8.
- BENNETT, S., AGYEPONG, I. A., SHEIKH, K., HANSON, K., SSENGOOBA, F. & GILSON, L. 2011. Building the Field of Health Policy and Systems Research: An Agenda for Action. *PLoS medicine*, 8.
- BODEKER, G. & WILLCOX, M. 2000. The first international meeting of the Research Initiative on Traditional Antimalarial Methods (RITAM). *J Altern Complement Med*, 6, 195-207.
- BOSCH, X. 2004. Clinical trials partnership seeks to boost research in developing countries. *JAMA*, 292, 1290.
- BROWN, K. H., MCLACHLAN, M., CARDOSA, P., TCHIBINDAT, F. & BAKER, S. K. 2010. Strengthening public health nutrition research and training capacities in West Africa: Report of a planning workshop convened in Dakar, Senegal, 26-28 March 2009. *Glob Public Health*, 5 Suppl 1, S1-19.
- BURGESS, L. J. & SULZER, N. U. 2010. Clinical trials in South Africa: Need for capacity building and training. *S Afr Med J*, 100, 402.
- CASALE, M., LANE, T., SELLO, L., KUO, C. & CLUVER, L. 2013. Conducting health survey research in a deep rural South African community: challenges and adaptive strategies. *Health Res Policy Syst*, 11, 14.
- CHANDA-KAPATA, P., CAMPBELL, S. & ZAROWSKY, C. 2012. Developing a national health research system: participatory approaches to legislative,

- institutional and networking dimensions in Zambia. *Health Res Policy Syst*, 10, 17.
- CHANDIWANA, S. & ORNBJERG, N. 2003. Review of North-South and South-South cooperation and conditions necessary to sustain research capability in developing countries. *J Health Popul Nutr*, 21, 288-97.
- CHATAWAY, J. & HANLIN, R. 2008. Sustainable (vaccine) development: the International AIDS Vaccine Initiative (IAVI) and capacity building. *In: MATLIN, S., DE FRANCISCO, A., SUNDARAM, L., FALCH, H. & GEHNER, M. (eds.) Health Partnerships Review*. Geneva: Global Forum for Health Research.
- CHEN, C., GREYSEN, R., MIPANDO, M. & RUGARABAMU, P. 2009. SAMSS Site Visit Report: Faculty of Health Sciences, School of Medicine, Jimma University, Ethiopia. SAMMS.
- CHOI, H. Y. & KO, J. W. 2010. Facilitating large-scale clinical trials: in Asia. *Urol Oncol*, 28, 691-2.
- COLLINS, F., BEAUDET, A., DRAGHIA-AKLI, R., GRUSS, P., SAVILL, J., SYROTA, A., DAUTRY, A., ULFENDAHL, M., WALPORT, M., ONKEN, J. & GLASS, R. I. 2013. A database on global health research in Africa. *The Lancet*, 1, e64-e65.
- COLOMA, J. & HARRIS, E. 2009. From construction workers to architects: developing scientific research capacity in low-income countries. *PLoS Biol*, 7, e1000156.
- COOKE, J. 2005. A framework to evaluate research capacity building in health care. *BMC Family Practice*, 6, 1-11.
- COSTELLO, A. & ZUMLA, A. 2000. Moving to research partnerships in developing countries. *BMJ*, 321, 827-9.

- COURTRIGHT, P. & FAAL, H. B. 2006. How can we strengthen ophthalmic research in Africa? *Can J Ophthalmol*, 41, 424-5.
- CRANE, J. 2011. Scrambling for Africa? Universities and global health. *The Lancet*, 377, 1388-1390.
- D'SOUZA, C. & SADANA, R. 2006. Why do case studies on national health research systems matter?: identifying common challenges in low- and middle-income countries. *Soc Sci Med*, 62, 2072-8.
- DAKIK, H. A., KAIDBEY, H. & SABRA, R. 2006. Research productivity of the medical faculty at the American University of Beirut. *Postgrad Med J*, 82, 462-4.
- DAVEY, S. 2004. The 10/90 Report on Health Research 2003-2004. *In: GLOBAL FORUM FOR HEALTH RESEARCH* (ed.). Geneva: Global Forum for Health Research.
- DE OLIVEIRA, N. A., LUZ, M. R., SARAVA, R. M. & ALVES, L. A. 2011. Student views of research training programmes in medical schools. *Med Educ*, 45, 748-55.
- DE THE, G. & ZETTERSTROM, R. 2005. Mother-child health research (IRN-MCH): achievements and prospects of an international network. *Acta Paediatr*, 94, 964-7.
- DE-GRAFT AIKINS, A., ARHINFUL, D. K., PITCHFORTH, E., OGEDEGBE, G., ALLOTEY, P. & AGYEMANG, C. 2012. Establishing and sustaining research partnerships in Africa: a case study of the UK-Africa Academic Partnership on Chronic Disease. *Global Health*, 8, 29.
- DECKELBAUM, R. J., NTAMBI, J. M. & WOLGEMUTH, D. J. 2011. Basic science research and education: a priority for training and capacity building in developing countries. *Infect Dis Clin North Am*, 25, 669-76, x.

- DELISLE, H., ROBERTS, J. H., MUNRO, M., JONES, L. & GYORKOS, T. W. 2005. The role of NGOs in global health research for development. *Health Res Policy Syst*, 3, 3.
- DEVASENAPATHY, N., SINGH, K. & PRABHAKARAN, D. 2009. Conduct of clinical trials in developing countries: a perspective. *Current Opinion in Cardiology*, 24, 295-300.
- DEVI, V., ABRAHAM, R. R., ADIGA, A., RAMNARAYAN, K. & KAMATH, A. 2010. Fostering research skills in undergraduate medical students through mentored students projects: example from an Indian medical school. *Kathmandu Univ Med J (KUMJ)*, 8, 294-8.
- DFID 2010. Capacity Building in Research. *In: DEVELOPMENT*, D. F. I. (ed.).
- DODANI, S. & LAPORTE, R. E. 2008. Ways to strengthen research capacity in developing countries: effectiveness of a research training workshop in Pakistan. *Public Health*, 122, 578-87.
- DODANI, S., SONGER, T., AHMED, Z. & LAPORTE, R. E. 2012. Building research capacity in developing countries: cost-effectiveness of an epidemiology course taught by traditional and video-teleconferencing methods in Pakistan. *Telemed J E Health*, 18, 621-8.
- EDITORIAL 2000. Enabling research in developing countries. *Lancet*, 356, 1043.
- EDITORIAL 2001. Strengthening research capacity's weakest link. *Lancet*, 358, 1381.
- EDITORIAL 2008. The Bamako call to action: research for health. *Lancet*, 372, 1855-1855.
- EDITORIAL 2009a. Bringing health research forward. *Tanzan J Health Res*, 11, iii-iv.
- EDITORIAL 2009b. Strengthening research capacity in Africa. *Lancet*, 374, 1.

- EDWARDS, N., WEBBER, J., MILL, J., KAHWA, E. & ROELOFS, S. 2009. Building capacity for nurse-led research. *Int Nurs Rev*, 56, 88-94.
- ENOCH, S. 2005. The Mexico Summit on Health Research 2004: medical community in developing countries has duty to promote healthcare research. *BMJ*, 330, 421.
- ESSENCE ON HEALTH RESEARCH 2011. Planning Monitoring and Evaluation; Framework for Capacity Strengthening in Health Research. *In: ESSENCE GOOD PRACTICE DOCUMENT SERIES* (ed.). Geneva: Copytrend.
- EXCLER, J. L. 2006. AIDS vaccine efficacy trials: expand capacity and prioritize. 'Throughout Africa, Asia and Latin America state-of-the-art clinics and laboratories...exist where, 4 years ago, there were none'. *Expert Rev Vaccines*, 5, 167-70.
- EXCLER, J. L., PITISUTTITHUM, P., RERKS-NGARM, S., SHAO, Y., ZHANG, L., TAMASHIRO, H., OSMANOV, S. & CONSULTATION, W.-U. R. 2008. Expanding research capacity and accelerating AIDS vaccine development in Asia. *Southeast Asian J Trop Med Public Health*, 39, 766-84.
- EZEH, A. C., IZUGBARA, C. O., KABIRU, C. W., FONN, S., KAHN, K., MANDERSON, L., UNDIH, A. S., OMIGBODUN, A. & THOROGOOD, M. 2010. Building capacity for public and population health research in Africa: the consortium for advanced research training in Africa (CARTA) model. *Glob Health Action*, 3.
- FATHALLA, M. F. 2004. Tapping the potential for health research in developing countries. *Bull World Health Organ*, 82, 722.



- GADSBY, E. W. 2011. Research capacity strengthening: donor approaches to improving and assessing its impact in low- and middle-income countries. *Int J Health Plann Manage*, 26, 89-106.
- GARCIA, P. J., COTRINA, A., GOTUZZO, E., GONZALEZ, E. & BUFFARDI, A. L. 2010. Research training needs in Peruvian national TB/HIV programs. *BMC Medical Education*, 10.
- GARRETT, L. 2007. The Challenge of Global Health. (cover story). *Foreign Affairs*, 86, 14-38.
- GAYM, A. 2008. Health research in Ethiopia--past, present and suggestions on the way forward. *Ethiop Med J*, 46, 287-308.
- GELDENHUYS, H., VELDSMAN, A., TAMERIS, M., LUABEYA, A., HANEKOM, W., MAHOMED, H. & HATHERILL, M. 2013. Analysis of time to regulatory and ethical approval of SATVI TB vaccine trials in South Africa. *S Afr Med J*, 103, 85-9.
- GELDENHUYS, H., WAGGIE, Z., JACKS, M., GELDENHUYS, M., TRAUT, L., TAMERIS, M., HATHERILL, M., HANEKOM, W. A., SUTTER, R., HUSSEY, G. & MAHOMED, H. 2012. Vaccine trials in the developing world: operational lessons learnt from a phase IV poliomyelitis vaccine trial in South Africa. *Vaccine*, 30, 5839-43.
- GEZMU, M., DEGRUTTOLA, V., DIXON, D., ESSEX, M., HALLORAN, E., HOGAN, J., GROBLER, A., KIM, S., MCDERMOTT, J., MCKAIG, R. & NEATON, J. D. 2011. Strengthening biostatistics resources in sub-Saharan Africa: research collaborations through U.S. partnerships. *Stat Med*, 30, 695-708.

- GILMOUR, J. W., STEVENS, W. S., GRAY, C. & DE SOUZA, M. 2007. Laboratory expansion to large-scale international HIV preventive vaccine trials. *Curr Opin HIV AIDS*, 2, 201-6.
- GLOBAL FORUM FOR HEALTH RESEARCH 2000. The 10/90 report on health research 2000. In: RESEARCH, G. F. F. H. (ed.). Geneva: Global Forum for Health Research.
- GONZALEZ-BLOCK, M. A., VARGAS-RIANO, E. M., SONELA, N., IDROVO, A. J., OUWE-MISSI-OUKEM-BOYER, O. & MONOT, J. J. 2011. Research capacity for institutional collaboration in implementation research on diseases of poverty. *Trop Med Int Health*, 16, 1285-90.
- GOTCH, F. & GILMOUR, J. 2007. Science, medicine and research in the developing world: a perspective. *Nat Immunol*, 8, 1273-6.
- GOTO, A., NGUYEN, T. N., NGUYEN, T. M. & HUGHES, J. 2005. Building postgraduate capacity in medical and public health research in Vietnam: an in-service training model. *Public Health*, 119, 174-83.
- GRAY, G. E., DE BRUYN, G., SLACK, C., STEEL, G. & WILLIAMSON, C. 2006. Preparing developing countries for efficacy trials. *Curr Opin HIV AIDS*, 1, 330-5.
- GREEN, A. & BENNETT, S. (eds.) 2007. *Sound Choices: Enhancing Capacity for Evidence-Informed Health Policy*, Geneva: World Health Organisation.
- GREENWOOD, B., BHASIN, A. & TARGETT, G. 2012. The Gates Malaria Partnership: a consortium approach to malaria research and capacity development. *Trop Med Int Health*, 17, 558-63.

- GREENWOOD, B. M., BHASIN, A., BOWLER, C. H., NAYLOR, H. & TARGETT, G. A. 2006. Capacity strengthening in malaria research: the Gates Malaria Partnership. *Trends Parasitol*, 22, 278-84.
- GUINDO, M. A., SHOTT, J. P., SAYE, R., DIAKITE, M. L., SANOGO, S., DEMBELE, M. B., KEITA, S., NAGEL, M. C., ELLIS, R. D., AEBIG, J. A., DIALLO, D. A. & DOUMBO, O. K. 2012. Promoting good clinical laboratory practices and laboratory accreditation to support clinical trials in sub-Saharan Africa. *Am J Trop Med Hyg*, 86, 573-9.
- GULLAND, A. 2012. Plan to stimulate research in developing countries is put on hold. *BMJ*, 344, e3771.
- GYAPONG, J. & OFORI-ADJEI, D. 2011. Capacity building for relevant health research in developing countries. *In*: UNIT, H. R. (ed.). University of Ghana Medical School.
- HALABI-NASSIF, H. & HATEM, M. 2008. [Evidence-based practice and the development of a nursing research culture]. *Perspect Infirm*, 5, 36-42.
- HARGREAVES, S. 2002. Wellcome Trust promotes ethical research in developing world. *BMJ*, 325, 986.
- HARRIES, A. D. 2003. Integration of operational research into National Tuberculosis Control Programmes. *Tuberculosis (Edinb)*, 83, 143-7.
- HARRIES, A. D., RUSEN, I. D., REID, T., DETJEN, A. K., BERGER, S. D., BISSELL, K., HINDERAKER, S. G., EDGINTON, M., FUSSELL, M., FUJIWARA, P. I. & ZACHARIAH, R. 2011. The Union and Medecins Sans Frontieres approach to operational research. *Int J Tuberc Lung Dis*, 15, 144-54, i.

- HARUN AR, R. 2004. Promoting road traffic injuries research in South Asia: capacity strengthening in health research. *J Coll Physicians Surg Pak*, 14, 736-8.
- HIGGS, E. S., HAYDEN, F. G., CHOTPITAYASUNONDH, T., WHITWORTH, J. & FARRAR, J. 2008. The Southeast Asian Influenza Clinical Research Network: development and challenges for a new multilateral research endeavor. *Antiviral Res*, 78, 64-8.
- HOYT, P. 2006. Problem Solving for Better Health Nursing: a working approach to the development and dissemination of applied research in developing countries. *Appl Nurs Res*, 19, 110-2; discussion 112.
- HUSSEY, G. & HAWKRIDGE, A. 2012. The state and future of research at the University of Cape Town's Faculty of Health Sciences. *S Afr Med J*, 102, 412-4.
- HYDER, A. A., AKHTER, T. & QAYYUM, A. 2003. Capacity development for health research in Pakistan: the effects of doctoral training. *Health Policy Plan*, 18, 338-43.
- IACCARINO, M. 2004. Mastering science in the South. To develop much-needed research capacity, developing countries cannot rely on the industrialized world, but have to find their own specific solutions. *EMBO Rep*, 5, 437-41.
- IJSSELMUIDEN, C., MARAIS, D. L., BECERRA-POSADA, F. & GHANNEM, H. 2012. Africa's neglected area of human resources for health research - the way forward. *S Afr Med J*, 102, 228-33.
- JAFFAR, S., LAZARUS, J. V., ONYEBUJOH, P., CHAKAYA, J., GARRIB, A., MWABA, P., MBOUP, S., BELLIS, K., EGWAGA, S., CORRAH, T. & COUTINHO, A.

2010. Health services strengthening in Africa--research is a key component. *Trop Med Int Health*, 15, 1270-3.
- JENTSCH, B. & PILLEY, C. 2003. Research relationships between the South and the North: Cinderella and the ugly sisters? *Soc Sci Med*, 57, 1957-67.
- JOHNSON, K., KENNEDY, S. B., HARRIS, A. O., LINCOLN, A., NEACE, W. & COLLINS, D. 2005. Strengthening the HIV/AIDS service delivery system in Liberia: an international research capacity-building strategy. *J Eval Clin Pract*, 11, 257-73.
- JONES, N., BAILEY, M. & LYYTIKAINEN, M. 2007. Research capacity strengthening in Africa: Trends, gaps and opportunities. *In*: INSTITUTE, O. D. (ed.). London: Overseas Development Institute.
- KABIRU, C. W., IZUGBARA, C. O., WAMBUGU, S. W. & EZEH, A. C. 2010. Capacity development for health research in Africa: experiences managing the African Doctoral Dissertation Research Fellowship Program. *Health Res Policy Syst*, 8, 21.
- KAMUNYORI, S., AL-BADER, S., SEWANKAMBO, N., SINGER, P. A. & DAAR, A. S. 2010. Science-based health innovation in Uganda: creative strategies for applying research to development. *BMC Int Health Hum Rights*, 10 Suppl 1, S5.
- KARIUKI, T., PHILLIPS, R., NJENGA, S., OLESEN, O. F., KLATSER, P. R., PORRO, R., LOCK, S., CABRAL, M. H., GLIBER, M. & HANNE, D. 2011. Research and capacity building for control of neglected tropical diseases: the need for a different approach. *PLoS Negl Trop Dis*, 5, e1020.

- KASONDE, J. M. & CAMPBELL, S. 2012. Creating a Knowledge Translation Platform: nine lessons from the Zambia Forum for Health Research. *Health Res Policy Syst*, 10, 31.
- KELLERMAN, R., KLIPSTEIN-GROBUSCH, K., WEINER, R., WAYLING, S. & FONN, S. 2012. Investing in African research training institutions creates sustainable capacity for Africa: the case of the University of the Witwatersrand School of Public Health masters programme in epidemiology and biostatistics. *Health Res Policy Syst*, 10, 11.
- KENT, S. J., COOPER, D. A., CHHI VUN, M., SHAO, Y., ZHANG, L., GANGULY, N., BELA, B., TAMASHIRO, H., DITANGCO, R., RERKS-NGARM, S., PITISUTTITHUM, P., VAN KINH, N., BERNSTEIN, A., OSMANOV, S., INVESTIGATORS, A. V. F. A. N. & SUPPORTERS 2010. AIDS vaccine for Asia Network (AVAN): expanding the regional role in developing HIV vaccines. *PLoS Med*, 7, e1000331.
- KHAN, F. A. 2010. Challenges of anaesthesia research in developing countries. *J Coll Physicians Surg Pak*, 20, 563-4.
- KHAN, H., KHAN, S. & IQBAL, A. 2009. Knowledge, attitudes and practices around health research: the perspective of physicians-in-training in Pakistan. *BMC Med Educ*, 9, 46.
- KHANNA, R., HOTA, P. & LAHARIYA, C. 2010. Health research strengthening and operational research needs for improving child survival in India. *Indian J Pediatr*, 77, 291-9.
- KILAMA, W. L. 2001. The malaria burden and the need for research and capacity strengthening in Africa. *Am J Trop Med Hyg*, 64, iii.

- KILAMA, W. L. 2009. The 10/90 gap in sub-Saharan Africa: resolving inequities in health research. *Acta Trop*, 112 Suppl 1, S8-S15.
- KILAMA, W. L., CHILENGI, R. & WANGA, C. L. 2007. Towards an African-driven malaria vaccine development program: history and activities of the African Malaria Network Trust (AMANET). *Am J Trop Med Hyg*, 77, 282-8.
- KIRIGIA, J. M. & WAMBEBE, C. 2006. Status of national health research systems in ten countries of the WHO African Region. *BMC Health Serv Res*, 6, 135.
- KITUA, A. Y. 2007. Health research agenda for East Africa in the new millennium: looking ahead. *Tanzan Health Res Bull*, 9, 147-53.
- KITUA, A. Y., CORRAH, T., HERBST, K., NYRENDA, T., AGWALE, S., MAKANGA, M. & MGONE, C. S. 2009. Strengthening capacity, collaboration and quality of clinical research in Africa: EDCTP Networks of Excellence. *Tanzan J Health Res*, 11, 51-4.
- KOK, M. O., RODRIGUES, A., SILVA, A. P. & DE HAAN, S. 2012. The emergence and current performance of a health research system: lessons from Guinea Bissau. *Health Res Policy Syst*, 10, 5.
- KWONG, J. S. & YU, C. M. 2013. The need for multicentre cardiovascular clinical trials in Asia. *Nat Rev Cardiol*, 10, 355-62.
- LAABES, E. P., DESAI, R., ZAWEDDE, S. M. & GLEW, R. H. 2011. How much longer will Africa have to depend on western nations for support of its capacity-building efforts for biomedical research? *Trop Med Int Health*, 16, 258-62.
- LANG, T. 2011. Advancing global health research through digital technology and sharing data. *Science*, 331, 714-7.

- LANG, T. & SIRIBADDANA, S. 2012. Clinical trials have gone global: is this a good thing? *PLoS Med*, 9, e1001228.
- LANG, T. A. & KOKWARO, G. O. 2008. Malaria drug and vaccine trials in Africa: obstacles and opportunities. *Trans R Soc Trop Med Hyg*, 102, 7-10.
- LANG, T. A., WHITE, N. J., TRAN, H. T., FARRAR, J. J., DAY, N. P., FITZPATRICK, R., ANGUS, B. J., DENIS, E., MERSON, L., CHEAH, P. Y., CHILENGI, R., KIMUTAI, R. & MARSH, K. 2010. Clinical research in resource-limited settings: enhancing research capacity and working together to make trials less complicated. *PLoS Negl Trop Dis*, 4, e619.
- LANGER, A., DIAZ-OLAVARRIETA, C., BERDICHEVSKY, K. & VILLAR, J. 2004. Why is research from developing countries underrepresented in international health literature, and what can be done about it? *Bull World Health Organ*, 82, 802-3.
- LANSANG M. & DENNIS R. 2007. The need to develop research capacity. *Global Forum Update on Research for Health Volume 4*. London: Pro-Brook Publishing Ltd.
- LANSANG, M. A. & DENNIS, R. 2004. Building capacity in health research in the developing world. *Bull World Health Organ*, 82, 764-70.
- LAZARUS, J. V., WALLACE, S. A. & LILJESTRAND, J. 2010. Improving African health research capacity. *Scand J Public Health*, 38, 670-1.
- LEE, P. P. & LAU, Y. L. 2011. Improving care, education, and research: the Asian primary immunodeficiency network. *Ann N Y Acad Sci*, 1238, 33-41.
- LEHNER, T., HOELSCHER, M., CLERICI, M., GOTCH, F., PEDNEAULT, L., TARTAGLIA, J., GRAY, C., MESTECKY, J., SATTENTAU, Q., VAN DE WIJGERT, J., TOURE, C., OSMANOV, S., SCHMIDT, R. E., DEBRE, P.,



- ROMARIS, M., HOEVELER, A. & DI FABIO, S. 2005. European Union and EDCTP strategy in the global context: recommendations for preventive HIV/AIDS vaccines research. *Vaccine*, 23, 5551-6.
- LESI, O. A., ORENUGA, O. O., ROBERTS, A. & ABUDU, O. O. 2009. Research productivity of junior academic staff at a tertiary medical college in south west, Nigeria. *Nig Q J Hosp Med*, 19, 119-24.
- LEXCHIN, J. 2010. One step forward, one step sideways? Expanding research capacity for neglected diseases. *BMC Int Health Hum Rights*, 10, 20.
- LI, M., WEI, L., LIU, H. & TANG, L. 2009. Integrative review of international nursing research in Mainland China. *Int Nurs Rev*, 56, 28-33.
- LOUISA, M., TAKEUCHI, M., SETIABUDY, R. & NAFRIALDI 2012. Current status of phase I clinical trials in Asia: an academic perspectives. *Acta Med Indones*, 44, 71-7.
- LUTUMBA, P., KANDE, V., BOELAERT, M., KAYEMBE, J. M. & MAMPUNZA, S. 2010. Research capacity strengthening in the DRC. *Lancet*, 375, 1080.
- MAGWAZA, S., MATHAMBO, V., MAGONGO, B., MVO, E. & MAKHANYA, N. 2003. Health research Capacity Building in South Africa: Current knowledge and practices. Durban: Health Systems Trust.
- MANABE, Y. C., KATABIRA, E., BROUGH, R. L., COUTINHO, A. G., SEWANKAMBO, N. & MERRY, C. 2011. Developing independent investigators for clinical research relevant for Africa. *Health Res Policy Syst*, 9, 44.
- MARAI, D., TOOHEY, J., EDWARDS, D. & JUSSELMUIDEN, C. 2013. Where there is no lawyer: Guidance for fairer contract negotiation in collaborative research

- partnerships. *In: DEVELOPMENT, C. I. H. R. F. (ed.). Geneva & Pietermaritzburg: Council in Health Research for Development.*
- MARCHETTI, E., MAZARIN-DIOP, V., CHAUMONT, J., MARTELLET, L., MAKADI, M. F., VIVIANI, S., KULKARNI, P. S. & PREZIOSI, M. P. 2012. Conducting vaccine clinical trials in sub-Saharan Africa: operational challenges and lessons learned from the Meningitis Vaccine Project. *Vaccine*, 30, 6859-63.
- MARJANOVIC, S., HANLIN, R., DIEPEVEEN, S. & CHATAWAY, J. 2012. RESEARCH CAPACITY-BUILDING IN AFRICA: NETWORKS, INSTITUTIONS AND LOCAL OWNERSHIP. *Journal of International Development*, n/a-n/a.
- MARSHALL-LUCETTE, S., CORBETT, K., LARTEY, N., OPIO, D. & BIKAITWOHA, M. E. 2007. Developing locally based research capacity in Uganda. *Int Nurs Rev*, 54, 227-33.
- MARTINS, N. & HAWKINS, Z. 2012. Striving for better health through health research in post-conflict Timor-Leste. *Health Res Policy Syst*, 10, 13.
- MATEE, M. I., MANYANDO, C., NDUMBE, P. M., CORRAH, T., JAOKO, W. G., KITUA, A. Y., AMBENE, H. P., NDOUNGA, M., ZIJENAH, L., OFORI-ADJEI, D., AGWALE, S., SHONGWE, S., NYIRENDA, T. & MAKANGA, M. 2009. European and Developing Countries Clinical Trials Partnership (EDCTP): the path towards a true partnership. *BMC Public Health*, 9, 249.
- MAYHEW, S. H., DOHERTY, J. & PITAYARANGSARIT, S. 2008. Developing health systems research capacities through north-south partnership: an evaluation of collaboration with South Africa and Thailand. *Health Res Policy Syst*, 6, 8.
- MAZIAK, W. 2001. Global health research. Science aid programme could be set up to help researchers in developing countries. *BMJ*, 322, 173.

- MBUAGBAW, L., ONGOLO-ZOGO, P. & THABANE, L. 2013. Investigating community ownership of a text message programme to improve adherence to antiretroviral therapy and provider-client communication: a mixed methods research protocol. *BMJ Open*, 3.
- MBUAGBAW, L., THABANE, L., ONGOLO-ZOGO, P. & LANG, T. 2011. The challenges and opportunities of conducting a clinical trial in a low resource setting: the case of the Cameroon mobile phone SMS (CAMPS) trial, an investigator initiated trial. *Trials*, 12, 145.
- MCKEE, M. 2008. Global research for health. *British Medical Journal*, 337.
- MCKEE, M., STUCKLER, D. & BASU, S. 2012. Where there is no health research: what can be done to fill the global gaps in health research? *PLoS Med*, 9, e1001209.
- MEDAGLINI, D. & HOEVELER, A. 2003. The European research effort for HIV/AIDS, malaria and tuberculosis. *Vaccine*, 21 Suppl 2, S116-20.
- MELIS, T., ASHCROFT, K., MACFARLANE, I., RAYNER, P., SEMELA, T. & YIZENGAW, T. 2008. Human capacity building needs analysis of Ethiopian new public universities (NPU). *In: CENTRE FOR INTERNATIONAL COOPERATION, V. U. A. (ed.). Development Assistance Group, Ethiopia.*
- MGONE, C., VOLMINK, J., COLES, D., MAKANGA, M., JAFFAR, S. & SEWANKAMBO, N. 2010. Linking research and development to strengthen health systems in Africa. *Trop Med Int Health*, 15, 1404-6.
- MGONE, C. S. 2010. Strengthening of the clinical research capacity for malaria: a shared responsibility. *Malar J*, 9 Suppl 3, S5.

- MGONE, S. & MOCUMBI, P. 2008. Collaborative approach to clinical trials. *In*: MAITLIN, S., DE FRANCISCO, A., SUNDARAM, L., FAICH, H. & GEHNER, M. (eds.) *Health Partnerships Review*. Geneva: Global Forum for Health Research.
- MIIRO, G. M., OUKEM-BOYER, O. O., SARR, O., RAHMANI, M., NTOUMI, F., DHEDA, K., PYM, A., MBOUP, S. & KALEEBU, P. 2013. EDCTP regional networks of excellence: initial merits for planned clinical trials in Africa. *BMC Public Health*, 13, 258.
- MINJA, H., NSANZABANA, C., MAURE, C., HOFFMANN, A., RUMISHA, S., OGUNDAHUNSI, O., ZICKER, F., TANNER, M. & LAUNOIS, P. 2011. Impact of Health Research Capacity Strengthening in Low- and Middle-Income Countries: The Case of WHO/TDR Programmes. *Plos Neglected Tropical Diseases*, 5.
- MONY, P. K., KURPAD, A. & VAZ, M. 2005. Capacity building in collaborative research is essential. *BMJ*, 331, 843-4.
- MORAN, M., GUZMAN, J., ROPARS, A., JORGENSEN, M., POTTER, S., MCDONALD, A. & HAILE-SELASSIE, H. 2008. Clinical trial site capacity for malaria product development. *In*: MAITLIN, S., DE FRANCISCO, A., SUNDARAM, L., FAICH, H. & GEHNER, M. (eds.) *Health Partnerships Review*. Geneva: Global Forum for Health Research, Geneva.
- MORENO-BORCHART, A. 2004. One problem at a time. Building research capacities in developing countries is necessary for economic success in the long term. But the numerous problems in doing so have to be solved for each country individually. *EMBO Rep*, 5, 127-30.

- MULDOON, K. A., BIRUNGI, J., BERRY, N. S., NGOLOBE, M. H., MWESIGWA, R., SHANNON, K. & MOORE, D. M. 2012. Supporting southern-led research: implications for North-South research partnerships. *Can J Public Health*, 103, 128-31.
- MULLAN, F., FREHYWOT, S., OMASWA, F., BUCH, E., CHEN, C., GREYSEN, S. R., WASSERMANN, T., ABUBAKR, D. E., AWASES, M., BOELEN, C., DIOMANDE, M. J., DOVLO, D., FERRO, J., HAILEAMLAK, A., IPUTO, J., JACOBS, M., KOUMARE, A. K., MIPANDO, M., MONEKOSSO, G. L., OLAPADE-OLAOPA, E. O., RUGARABAMU, P., SEWANKAMBO, N. K., ROSS, H., AYAS, H., CHALE, S. B., CYPRIEN, S., COHEN, J., HAILE-MARIAM, T., HAMBURGER, E., JOLLEY, L., KOLARS, J. C., KOMBE, G. & NEUSY, A. J. 2011. Medical schools in sub-Saharan Africa. *Lancet*, 377, 1113-21.
- MUULA, A. S. 2007. What drives health research in a developing country? *Croat Med J*, 48, 261-7.
- MWABA, P., BATES, M., GREEN, C., KAPATA, N. & ZUMLA, A. 2010. Research capacity strengthening in African countries. *Lancet*, 375, 1874.
- MWANGOKA, G., OGUTU, B., MSAMBICHAKA, B., MZEE, T., SALIM, N., KAFURUKI, S., MPINA, M., SHEKALAGHE, S., TANNER, M. & ABDULLA, S. 2013. Experience and challenges from clinical trials with malaria vaccines in Africa. *Malar J*, 12, 86.
- NACHEGA, J. B., UTHMAN, O. A., HO, Y. S., LO, M., ANUDE, C., KAYEMBE, P., WABWIRE-MANGEN, F., GOMO, E., SOW, P. S., OBIKE, U., KUSIAKU, T., MILLS, E. J., MAYOSI, B. M. & JJSSELMUIDEN, C. 2012. Current status and

- future prospects of epidemiology and public health training and research in the WHO African region. *Int J Epidemiol*, 41, 1829-46.
- NANTULYA, F. N., KENGEYA-KAYONDO, J. F. & OGUNDAHUNSI, O. A. 2007. Research themes and advances in malaria research capacity made by the Multilateral Initiative on Malaria. *Am J Trop Med Hyg*, 77, 303-13.
- NCHINDA, T. C. 2002. Research capacity strengthening in the South. *Soc Sci Med*, 54, 1699-711.
- NJIE-CARR, V., KALENGE, S., KELLEY, J., WILSON, A., MULIIRA, J. K., NABIRYE, R. C., GLASS, N., BOLLINGER, R., ALAMO-TALISUNA, S. & CHANG, L. W. 2012. Research capacity-building program for clinicians and staff at a community-based HIV clinic in Uganda: A pre/post evaluation. *J Assoc Nurses AIDS Care*, 23, 431-41.
- NTOUMI, F. 2010. Networking and capacity building for health research in Central Africa. *Wien Klin Wochenschr*, 122 Suppl 1, 23-6.
- NUYENS, Y. 2005. No Development Without Research. Geneva: Global Forum for Health Research.
- OGUTU, B. R., BAIDEN, R., DIALLO, D., SMITH, P. G. & BINKA, F. N. 2010. Sustainable development of a GCP-compliant clinical trials platform in Africa: the malaria clinical trials alliance perspective. *Malar J*, 9, 103.
- OLVEDA, R., LEONARDO, L., ZHENG, F., SRIPA, B., BERGQUIST, R. & ZHOU, X. N. 2010. Coordinating research on neglected parasitic diseases in Southeast Asia through networking. *Adv Parasitol*, 72, 55-77.
- PANG, T., SADANA, R., HANNEY, S., BHUTTA, Z., HYDER, A. & SIMON, J. 2003. Knowledge for better health — a conceptual framework and foundation for

health research systems. *Bulletin of the World Health Organization*, 81, 815-820.

PARLIMENTARY OFFICE OF SCIENCE AND TECHNOLOGY 2004. Scientific Capacity In Developing Countries. *In: TECHNOLOGY, P. O. O. S. A. (ed.)*. London: Parliamentary Office of Science and Technology.

PARRY, C., MOROJELE, N., MYERS, B. & PLUDDMANN, A. 2013. Addiction research centres and the nurturing of creativity: The Alcohol & Drug Abuse Research Unit at the South African Medical Research Council - strengthening substance abuse research and policy in South Africa. *Addiction*, 108, 14-9.

PERKOVIC, V., PATIL, V., WEI, L., LV, J., PETERSEN, M. & PATEL, A. 2012. Global randomized trials: the promise of India and China. *J Bone Joint Surg Am*, 94 Suppl 1, 92-6.

PETERSEN, P. E. 2009. Global policy for improvement of oral health in the 21st century--implications to oral health research of World Health Assembly 2007, World Health Organization. *Community Dent Oral Epidemiol*, 37, 1-8.

PITAYARANGSARIT, S. & TANGCHAROENSATHIEN, V. 2009. Sustaining capacity in health policy and systems research in Thailand. *Bull World Health Organ*, 87, 72-4.

PITISUTTITHUM, P., CHOOPANYA, K. & RERK-NGNAM, S. 2010. HIV-vaccine research and development in Thailand: evolution and challenges. *Vaccine*, 28 Suppl 2, B45-9.

PURTY, A. J. 2008. Reflections for research capacity development in India. *Natl Med J India*, 21, 263.

- RAB, M. A. 2003. Setting global health research priorities: investments for health research for developing countries must be increased. *BMJ*, 326, 1399.
- RABIU, T. B. & BALOGUN, J. A. 2009. Repositioning health research in developing countries. *Arch Med Res*, 40, 223.
- RAMJEE, G. 2008. Issues surrounding the implementation of multiple product development partnership clinical trials in developing countries. *In: RESEARCH, G. F. F. H. (ed.). Geneva: Global Forum for Health Research.*
- REDMAN-MACLAREN, M., MACLAREN, D. J., HARRINGTON, H., ASUGENI, R., TIMOTHY-HARRINGTON, R., KEKEUBATA, E. & SPEARE, R. 2012. Mutual research capacity strengthening: a qualitative study of two-way partnerships in public health research. *Int J Equity Health*, 11, 79.
- RERKS-NGARM, S., PITISUTTITHUM, P., GANGULY, N., ZHANG, L., TAMASHIRO, H., COOPER, D. A., VUN, M. C., BELA, B., DITANGCO, R., VAN KINH, N., BERNSTEIN, A., OSMANOV, S., MATHIESON, B., KENT, S. J. & SHAO, Y. 2010. Defining the objectives of the AIDS vaccine for Asia network: report of the WHO-UNAIDS/Global HIV vaccine enterprise regional consultation on expanding AIDS vaccine research and development capacity in Asia. *Curr Opin HIV AIDS*, 5, 435-52.
- RESNIK, D. B. 2004. The distribution of biomedical research resources and international justice. *Dev World Bioeth*, 4, 42-57.
- SABZWARI, S., KAUSER, S. & KHUWAJA, A. K. 2009. Experiences, attitudes and barriers towards research amongst junior faculty of Pakistani medical universities. *BMC Med Educ*, 9, 68.



- SADANA, R., D'SOUZA, C., HYDER, A. A. & CHOWDHURY, A. M. 2004. Importance of health research in South Asia. *BMJ*, 328, 826-30.
- SAWYER 2004. African Universities and the Challenge of Research Capacity Development. *JHEA/RESA Vol. 2, No. 1, 2004, pp. 211–240.*
- SAYED, S. I., DUTTA, S., MATEEN, S., KAZI, R. & JAGADE, M. 2011. Clinical health research in India: is there a way forward? *J Indian Med Assoc*, 109, 270-1.
- SCHLUGER, N., KARUNAKARA, U., LIENHARDT, C., NYIRENDA, T. & CHAISSON, R. 2007. Building Clinical Trials Capacity for Tuberculosis Drugs in High-Burden Countries. *PLoS Med*, 4, e302.
- SEN, F. & MUTHUSWAMY, V. 2006. Capacity building for clinical trials in India. *Indian J Med Res*, 124, 605-7.
- SHAFIQ, N., PANDHI, P. & MALHOTRA, S. 2009. Investigator-initiated pragmatic trials in developing countries--much needed but much ignored. *Br J Clin Pharmacol*, 67, 141-2.
- SHANKAR, P. R. 2007. Mentoring a medical student towards applied research in a developing country. *Med Teach*, 29, 253-4.
- SHANKAR, P. R., CHANDRASEKHAR, T. S., MISHRA, P. & SUBISH, P. 2006. Initiating and strengthening medical student research: time to take up the gauntlet. *Kathmandu Univ Med J (KUMJ)*, 4, 135-8.
- SHANN, F. 2002. Research in developing countries. *N Engl J Med*, 346, 627-8.
- SHIRAHATTI, R. V., SUR, S., SUMANTHPRASAD, G. R. & KHURANA, L. 2010. Dental students research inventory: a questionnaire to assess research challenges and opportunities. *J Dent Educ*, 74, 1308-18.

- SIEGFRIED, N. L. & HUGHES, G. 2012. Herbal medicine, randomised controlled trials and global core competencies. *S Afr Med J*, 102, 912-3.
- SILKAVUTE, P., TUNG, D. X. & JONGUDOMSUK, P. 2013. Sustaining a regional emerging infectious disease research network: a trust-based approach. *Emerg Health Threats J*, 6.
- SILOVE, D., REES, S., TAM, N., LIDDELL, B. & ZWI, A. 2011. Staff management and capacity building under conditions of insecurity: lessons from developing mental health service and research programs in post-conflict Timor-Leste. *Australas Psychiatry*, 19 Suppl 1, S90-4.
- SIRIWARDHANA, C., SUMATHIPALA, A., SIRIBADDANA, S., SAMARAWEERA, S., ABEYSINGHE, N., PRINCE, M. & HOTOFF, M. 2011. Reducing the scarcity in mental health research from low and middle income countries: a success story from Sri Lanka. *Int Rev Psychiatry*, 23, 77-83.
- SITTHI-AMORN, C., PONGPANICH, S., SOMRONGTHONG, R., LIKITKIRIRAT, T. & LIKITKIRIRAT, P. 2002. The Asian Voice in building equity in health for development - from the Asian Forum for Health Research, Manila, February 2000. *Health Policy Plan*, 17, 213-7.
- SITTHI-AMORN, C. & SOMRONGTHONG, R. 2000. Strengthening health research capacity in developing countries: a critical element for achieving health equity. *BMJ*, 321, 813-7.
- SMITH, R. 2002. Publishing research from developing countries. *Stat Med*, 21, 2869-77.
- SPARKS, B. L. & GUPTA, S. K. 2004. Research in family medicine in developing countries. *Ann Fam Med*, 2 Suppl 2, S55-9.

- STEPHEN, C. & DAIBES, I. 2010. Defining features of the practice of global health research: an examination of 14 global health research teams. *Glob Health Action*, 3.
- SUAALII-SAUNI, T., AIAVAO, F., FAAFEU-HOPE, E., SOPOAGA, T., PAUL, C., RIGHARTS, A., MCCOOL, J., KIRIFI-ALAI, T. N., HILL, P. & FUATAI, F. L. 2011. Strengthening health research capacity from within Samoa. *Asia Pac J Public Health*, 23, 100-9.
- SUMATHIPALA, A., SIRIBADDANA, S., SAMARAWEERA, S. & DAYARATNE, D. A. 2003. Capacity building through multi-disciplinary research: a report from Sri Lanka. *Br J Psychiatry*, 183, 457-8.
- THAMARANGSI, T. 2013. Addiction research centres and the nurturing of creativity: Center for Alcohol Studies (CAS), Thailand. *Addiction*, 108, 1201-6.
- THATTE, U. M. & BAVDEKAR, S. B. 2008. Clinical research in India: great expectations? *J Postgrad Med*, 54, 318-23.
- THORNICROFT, G., COOPER, S., BORTEL, T. V., KAKUMA, R. & LUND, C. 2012. Capacity building in global mental health research. *Harv Rev Psychiatry*, 20, 13-24.
- TIERNEY, W. M., NYANDIKO, W. N., SIIKA, A. M., WOOLS-KALOUSTIAN, K., SIDLE, J. E., KIPLAGAT, J., BELL, A. & INUI, T. S. 2013. "These are Good Problems to Have...": Establishing a Collaborative Research Partnership in East Africa. *J Gen Intern Med*.
- TSAI, S. L. 2000. Nurses' participation and utilization of research in the Republic of China. *Int J Nurs Stud*, 37, 435-44.

- TUGWELL, P., SITTHI-AMORN, C., HATCHER-ROBERTS, J., NEUFELD, V., MAKARA, P., MUNOZ, F., CZERNY, P., ROBINSON, V., NUYENS, Y. & OKELLO, D. 2006. Health Research Profile to assess the capacity of low and middle income countries for equity-oriented research. *BMC Public Health*, 6, 151.
- UTHMAN, O. A. 2008. Performance, priorities, and future of biomedical research publications in Africa: Need for networks between scientists in developed and developing countries. *Pan Afr Med J*, 1, 5.
- VAMADEVAN, A. S., SHAH, B. R., CALIFF, R. M. & PRABHAKARAN, D. 2011. Cardiovascular research in India: a perspective. *Am Heart J*, 161, 431-8.
- VAN HELDEN, P. 2012. The cost of research in developing countries. *EMBO Rep*, 13, 395.
- VAN ROYEN, K., LACHAT, C., HOLDSWORTH, M., SMIT, K., KINABO, J., ROBERFROID, D., NAGO, E., GARIMO ORACH, C. & KOLSTEREN, P. 2013. How can the operating environment for nutrition research be improved in sub-saharan Africa? The views of african researchers. *PLoS One*, 8, e66355.
- VARKEVISSER, C. M., MWALUKO, G. M. & LE GRAND, A. 2001. Research in action: the training approach of the Joint Health Systems Research Project for the Southern African Region. *Health Policy Plan*, 16, 281-91.
- VASQUEZ, E., HIRSCH, J., GIANG, L. & PARKER, R. 2013. Rethinking health research capacity strengthening. *Global Public Health*.
- VOGEL, I. 2011. Research Capacity Strengthening: Learning from Experience. *In*: (UKCDS), U. C. O. D. S. (ed.). UK Collaborative on Development Sciences (UKCDS).

- VOLMINK, J. & DARE, L. 2005. Addressing inequalities in research capacity in Africa. *BMJ*, 331, 705-6.
- WERTHEIM, H. F., PUTHAVATHANA, P., NGHIEM, N. M., VAN DOORN, H. R., NGUYEN, T. V., PHAM, H. V., SUBEKTI, D., HARUN, S., MALIK, S., ROBINSON, J., RAHMAN, M., TAYLOR, W., LINDEGARDH, N., WIGNALL, S., FARRAR, J. J. & DE JONG, M. D. 2010. Laboratory capacity building in Asia for infectious disease research: experiences from the South East Asia Infectious Disease Clinical Research Network (SEAICRN). *PLoS Med*, 7, e1000231.
- WHITE, F. 2002. Capacity-building for health research in developing countries: a manager's approach. *Rev Panam Salud Publica*, 12, 165-72.
- WHITE, M. T. 2007. A right to benefit from international research: a new approach to capacity building in less-developed countries. *Account Res*, 14, 73-92.
- WHITE, N. W. 2004. Capacity building for research: report on a UNION Strategic Planning Workshop. Report of a workshop held during the International Union Against Tuberculosis and Lung Disease World Conference on Lung Health, Montreal, Canada, 7 October 2002. *Int J Tuberc Lung Dis*, 8, 910-4.
- WHITWORTH, J., SEWANKAMBO, N. K. & SNEWIN, V. A. 2010. Improving implementation: building research capacity in maternal, neonatal, and child health in Africa. *PLoS Med*, 7, e1000299.
- WILLCOX, M., SIEGFRIED, N. & JOHNSON, Q. 2012. Capacity for clinical research on herbal medicines in Africa. *J Altern Complement Med*, 18, 622-8.
- WILLIAMS, J. R., SCHATZ, E. J., CLARK, B. D., COLLINSON, M. A., CLARK, S. J., MENKEN, J., KAHN, K. & TOLLMAN, S. M. 2010. Improving public health

training and research capacity in Africa: a replicable model for linking training to health and socio-demographic surveillance data. *Glob Health Action*, 3.

WORLD HEALTH ORGANISATION 2002. National Health Research Systems. Report of an international workshop, Cha-am, Thailand, 12–15 March 2001. Geneva: World Health Organisation.

WORLD HEALTH ORGANISATION 2004. World report on knowledge for better health: strengthening health systems. Geneva: World Health Organisation.

WORLD HEALTH ORGANISATION 2005. Ministerial Summit on Health Research (2004: Mexico City, Mexico). *In: REPORT FROM THE MINISTERIAL SUMMIT ON HEALTH RESEARCH: IDENTIFY CHALLENGES, I. A., CORRECT INEQUITIES.* (ed.). Geneva: World Health Organisation.

WORLD HEALTH ORGANISATION 2009. Scaling up research and learning for health systems: now is the time. *In: REPORT OF A HIGH LEVEL TASK FORCE, P. A. E. A. T. G. M. F. O. R. F. H., BAMAKO, MALI* (ed.). Geneva: World Health Organisation.

WORLD HEALTH ORGANISATION 2012. The WHO strategy on research for health. Geneva: World Health Organisation.

WRIGHT MDA, G., CAUFIELD, C., GRAY, G. & OLSON, J. 2005. International Research Capacity-Building Programs for Nurses to Study the Drug Phenomenon in Latin America: challenges and perspectives. *Rev Lat Am Enfermagem*, 13 Spec No, 1095-101.

YUSUF, S. 2002. Clinical research and trials in developing countries. *Stat Med*, 21, 2859-67.

- ZACHARIAH, R., HARRIES, A. D., ISHIKAWA, N., RIEDER, H. L., BISSELL, K., LASERSON, K., MASSAQUOI, M., VAN HERP, M. & REID, T. 2009. Operational research in low-income countries: what, why, and how? *Lancet Infect Dis*, 9, 711-7.
- ZACHARIAH, R., REID, T., SRINATH, S., CHAKAYA, J., LEGINS, K., KARUNAKARA, U. & HARRIES, A. D. 2011. Building leadership capacity and future leaders in operational research in low-income countries: why and how? *Int J Tuberc Lung Dis*, 15, 1426-35, i.
- ZAIN, R. B., GHANI, W. M., RAZAK, I. A., LATIFAH, R. J., SAMSUDDIN, A. R., CHEONG, S. C., ABDULLAH, N., ISMAIL, A. R., HUSSAINI, H. B., TALIB, N. A. & JALLALUDIN, A. 2009. Building partnership in oral cancer research in a developing country: processes and barriers. *Asian Pac J Cancer Prev*, 10, 513-8.
- ZHOU, X. N., WAYLING, S. & BERGQUIST, R. 2010. Concepts in research capabilities strengthening positive experiences of network approaches by TDR in the People's Republic of China and Eastern Asia. *Adv Parasitol*, 73, 1-19.
- ZICKER, F. 2001. Strengthening capability for malaria research in Africa. *Emerg Infect Dis*, 7, 529-30.
- ZUMLA, A., HUGGETT, J., DHEDA, K., GREEN, C., KAPATA, N. & MWABA, P. 2010. Trials and tribulations of an African-led research and capacity development programme: the case for EDCTP investments. *Trop Med Int Health*, 15, 489-94.
